# Supplementary material for: Graphene Quantum Dots Modified Upconversion Nanoparticles for Photodynamic Therapy
Source: MDPI journal article supplement (doi:10.3390/ijms232012558), 2022-10-19
Supplement: s1 [file s1]

# **Supplementary Information**

## **Graphene quantum dots modified upconversion nanoparticles for photodynamic therapy**

Yuting Li,<sup>#</sup> Yufei Wang,<sup>#</sup> Hong Shang\*, Jing Wu\*

School of Science, China University of Geosciences (Beijing), Beijing 100083, China

\*Corresponding authors: Hong Shang (Email: shanghong@cugb.edu.cn, TEL: +86-10-82322758); Jing Wu (Email: wujing@cugb.edu.cn, TEL: +86-10-82322758)

## 1. Characterization of UCNPs@GQDs

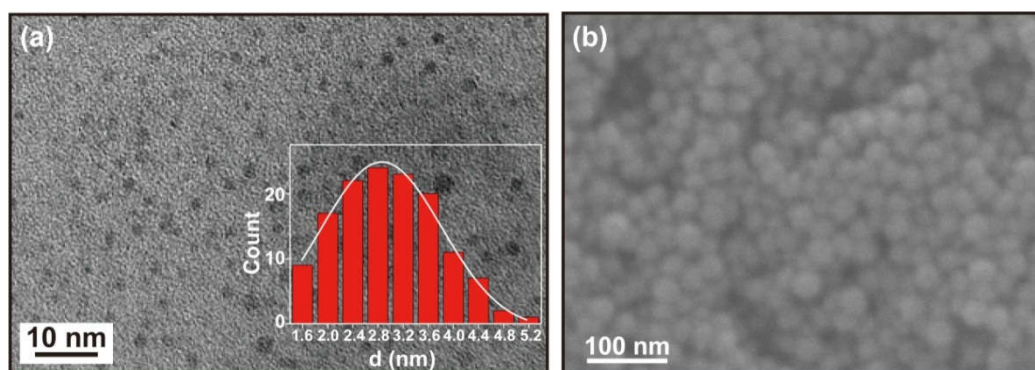

Figure S1. Characterization of GQDs and UCNPs@GQDs. (a) TEM image and size distribution of GQDs. (b) SEM image of UCNPs@GQDs.

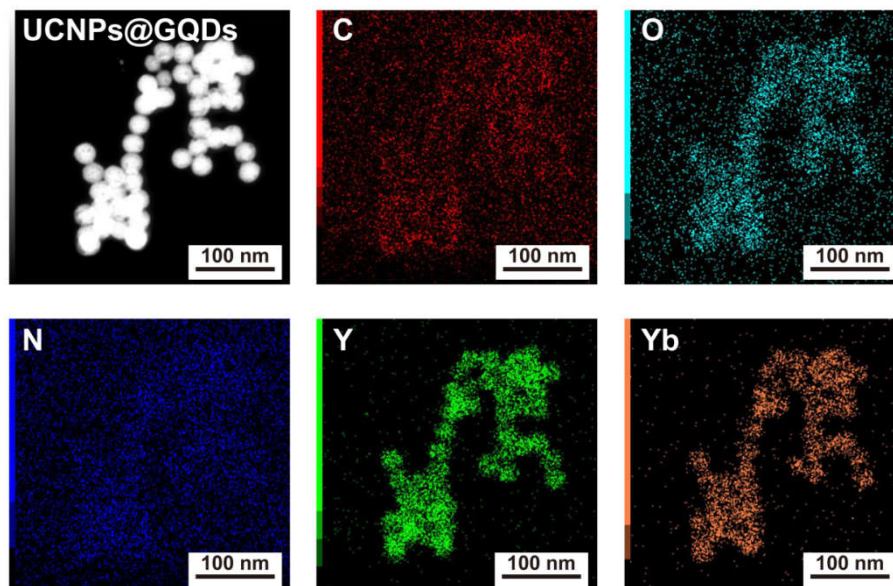

Figure S2. Elemental mapping of UCNPs@GQDs.

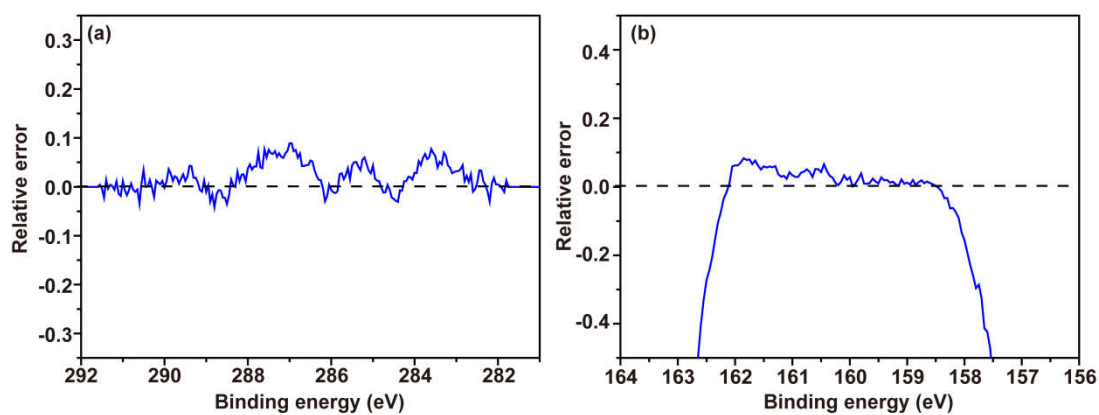

Figure S3. The convergence of XPS profiles. (a) The convergence of C1s XPS profiles of UCNPs@GQDs. (b) The convergence of Y 3d XPS profiles of UCNPs@GQDs.



## 2. $^1\text{O}_2$ detection

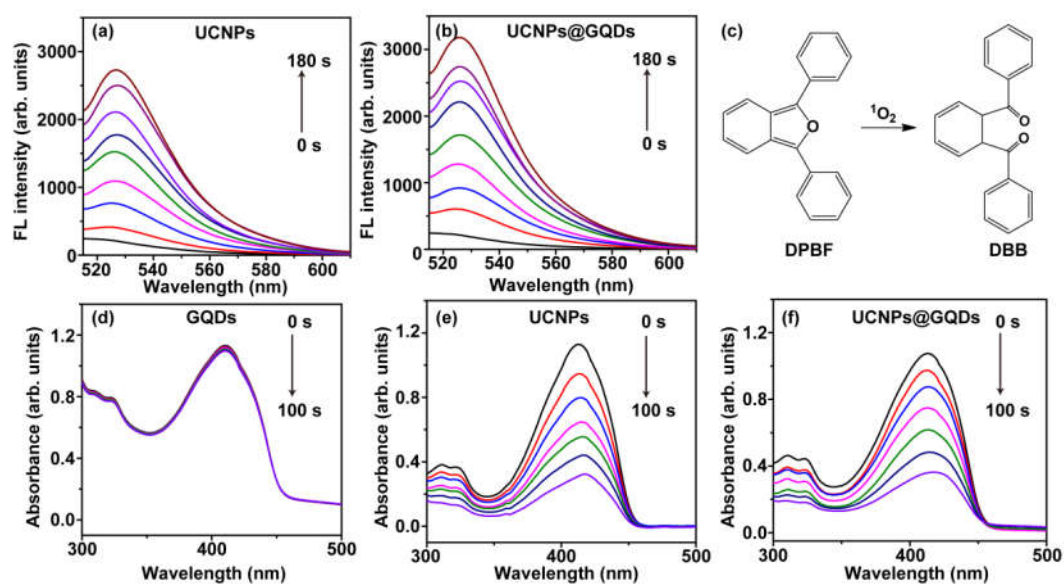

Figure S4.  $^1\text{O}_2$  detection by SOSG and DPBF. (a and b) FL intensity curves of SOSG were detected at 525 nm upon treating by UCNP and UCNP@GQDs and subsequent 980 nm laser irradiation in different time duration. (c) The reaction between DPBF and  $^1\text{O}_2$ . (d-f) Absorption decay curves of DPBF were detected at 420 nm upon treating by UCNP@GQDs and subsequent 980 nm laser irradiation in different time duration.

### 3. PDT assessment

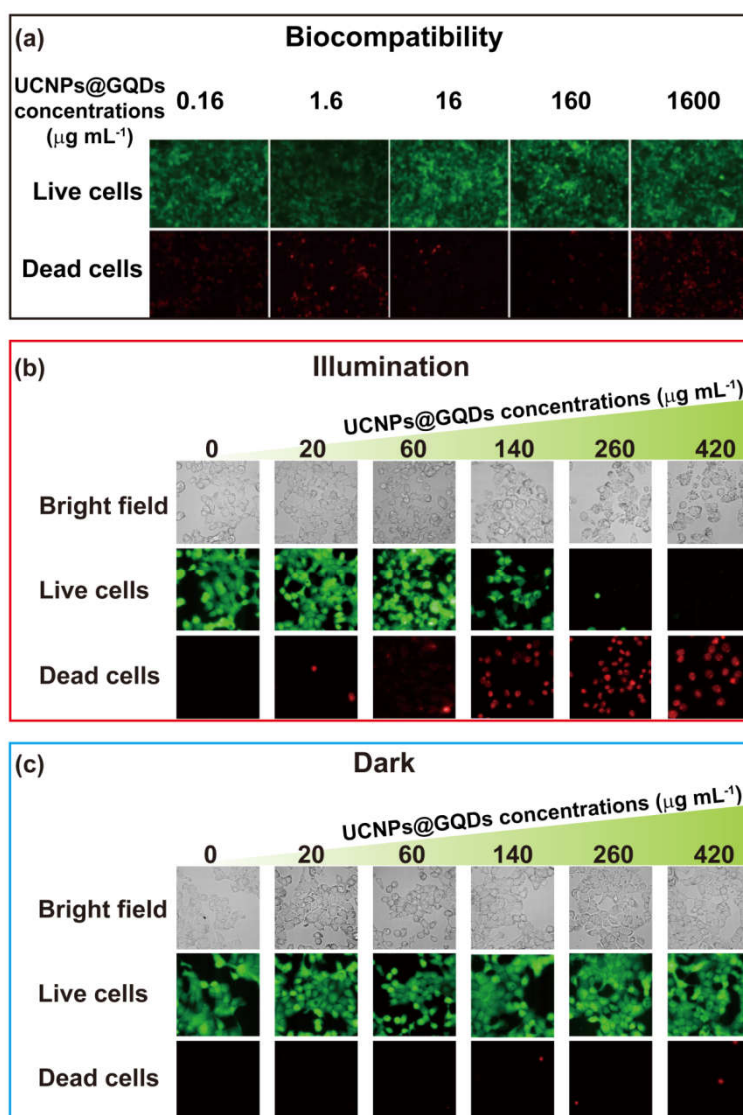

Figure S5. PDT assessment for UCNPs@GQDs. (a) Fluorescent images of HeLa cells treated by live/dead assay kit were taken after UCNPs@GQDs treatment without 980 nm laser irradiation in order to assess the biocompatible of UCNPs@GQDs. (b) Fluorescent images of HeLa cells treated by live/dead assay kit were taken after UCNPs@GQDs treatment with 980 nm laser irradiation in order to assess the PDT effect of UCNPs@GQDs. (c) Fluorescent images of HeLa cells treated by live/dead assay kit were taken after UCNPs@GQDs treatment without 980 nm laser irradiation for comparison.
